# Supplementary material
Source: publisher figshare collection journal article supplement (https://frontiersin.figshare.com/ndownloader/files/31321012)
Supplement: Supplementary file [file 31321012]

# Appendix: The functional trajectory of frail compared to non-frail critically-ill patients during the hospital stay

## Content of Appendix

|                                                                                                                                            |    |
|--------------------------------------------------------------------------------------------------------------------------------------------|----|
| <b>Table S1.</b> Logistic regression model used for propensity score matching _____                                                        | 2  |
| <b>Table S2.</b> Logistic regression model used for propensity score matching of survivors-only _____                                      | 3  |
| <b>Table S3.</b> Characteristics of the propensity score matching in survivors-only _____                                                  | 4  |
| <b>Table S4.</b> Sensitivity Analysis of the primary and secondary outcomes in the propensity score matched cohort in survivors-only _____ | 5  |
| <b>Table S5.</b> Deterioration at hospital discharge in a logistic regression model in all patients _____                                  | 6  |
| <b>Table S6:</b> Deterioration at hospital discharge in a logistic regression model in survivors-only _____                                | 7  |
| <b>Table S7.</b> Deterioration at ICU discharge in a logistic regression model in all patients. _____                                      | 8  |
| <b>Table S8.</b> Deterioration at ICU discharge in a logistic regression model in survivors-only _____                                     | 9  |
| <b>Table S9.</b> Secondary outcomes in all patients _____                                                                                  | 10 |
| <b>Table S10.</b> Functional trajectory using a mixed model of MTB over time in the propensity score matched cohort _____                  | 11 |
| <b>Table S11.</b> Functional trajectory using a mixed model of MTB over time in all patients _____                                         | 12 |
| <b>Table S12.</b> Functional trajectory using a mixed model of MTB over time in survivors-only _____                                       | 13 |

**Table S1.** Logistic regression model used for propensity score matching

|                                       | Odds Ratio [95% CI] <sup>a</sup> | P Value |
|---------------------------------------|----------------------------------|---------|
| Sex (ref:female)                      | 1.5 [1.1 - 2.0]                  | 0.013   |
| BMI <sup>a</sup> (kg/m <sup>2</sup> ) | 1.0 [1.0 - 1.0]                  | 0.735   |
| Age (years)                           | 1.0 [1.0 - 1.1]                  | <0.001  |
| Admission from (ref:home)             |                                  | <0.001  |
| hospital                              | 1.3 [0.9 - 1.7]                  | 0.171   |
| nursing home                          | 43.2 [5.6 - 333.6]               | <0.001  |
| unknown                               | 0.6 [0.1 - 5.4]                  | 0.640   |
| GCS <sup>a</sup>                      | 1.0 [1.0 - 1.1]                  | 0.536   |
| APACHE 2 <sup>a</sup>                 | 1.1 [1.0 - 1.1]                  | <0.001  |
| SOFA <sup>a</sup>                     | 1.0 [0.9 - 1.1]                  | 0.742   |
| CCI <sup>a</sup>                      | 1.2 [1.2 - 1.3]                  | <0.001  |
| Specialty (ref:Neurocritical)         |                                  | 0.221   |
| Surgical                              | 1.4 [1.0 - 2.0]                  | 0.073   |
| Medical                               | 1.7 [0.9 - 3.2]                  | 0.113   |
| Other                                 | 1.1 [0.4 - 2.8]                  | 0.867   |

This analysis includes all patients, missing values of deceased patients were assigned a value of 0, i.e., the worst possible outcome, Reference for sex is female,

<sup>a</sup> CI: Confidence Interval; BMI: Body Mass Index; SOFA: Sequential Organ Failure Assessment; APACHE II: Acute Physiology and Chronic Health Evaluation; GCS: Glasgow Coma Scale; CCI: Charlson Comorbidity Index

**Table S2.** Logistic regression model used for propensity score matching of survivors-only

|                                                    | Odds Ratio [95%CI] | P Value |
|----------------------------------------------------|--------------------|---------|
| Sex (ref:female)                                   | 1.1 [0.7 - 1.7]    | 0.605   |
| BMI <sup>a</sup> (kg/m <sup>2</sup> ) (ref:normal) |                    | 0.250   |
| underweight                                        | 1.5 [0.7 - 3.5]    | 0.317   |
| overweight                                         | 0.8 [0.5 - 1.2]    | 0.240   |
| obese                                              | 0.7 [0.4 - 1.3]    | 0.304   |
| missing                                            | 0.4 [0.1 - 1.6]    | 0.180   |
| Age (years) (ref: ≤50)                             |                    | <0.001  |
| 51-65                                              | 1.0 [0.5 - 2.1]    | 0.975   |
| 66-80                                              | 1.6 [0.8 - 3.3]    | 0.171   |
| >80                                                | 3.6 [1.7 - 7.9]    | 0.001   |
| Admission from (ref:home)                          |                    | <0.001  |
| hospital                                           | 1.6 [1.0 - 2.4]    | 0.037   |
| nursing home                                       | 43.9 [5.1 - 379.8] | <0.001  |
| unknown                                            | 0.0 [0.0 - Inf]    | 0.979   |
| GCS <sup>a</sup>                                   | 1.0 [1.0 - 1.1]    | 0.354   |
| APACHE 2 <sup>a</sup>                              | 1.1 [1.0 - 1.1]    | 0.002   |
| SOFA <sup>a</sup>                                  | 1.0 [0.9 - 1.1]    | 0.750   |
| CCI <sup>a</sup>                                   | 1.2 [1.1 - 1.3]    | <0.001  |
| Specialty (ref:Neurocritical)                      |                    | 0.715   |
| Surgical                                           | 1.3 [0.8 - 2.1]    | 0.249   |
| Medical                                            | 1.2 [0.5 - 3.2]    | 0.709   |
| Other                                              | 1.1 [0.4 - 3.1]    | 0.906   |

This analysis includes all patients, missing values of expired patients were assigned a value of 0, i.e., the worst possible outcome, Reference for sex is female.

<sup>a</sup> CI: Confidence Interval; BMI: Body Mass Index; SOFA: Sequential Organ Failure Assessment; APACHE II: Acute Physiology and Chronic Health Evaluation; GCS: Glasgow Coma Scale; CCI: Charlson Comorbidity Index

**Table S3.** Characteristics of the propensity score matching in survivors-only

| Characteristics of the propensity score matched survivors |                                    |                    |                           |       |         |                               |
|-----------------------------------------------------------|------------------------------------|--------------------|---------------------------|-------|---------|-------------------------------|
|                                                           | not selected<br>Non-Frail (n= 384) | Non-Frail (n= 268) | selected<br>Frail (n=125) | SMD   | P Value | not selected<br>Frail (n= 21) |
| Male                                                      | 153 (39.8)                         | 106 (39.6)         | 51 (40.8)                 | 0.025 | 0.901   | 7 (33.3)                      |
| BMI <sup>a</sup> (kg/m <sup>2</sup> )                     | 25.8 [23.5- 28.4]                  | 24.8 [22.7- 27.7]  | 24.6 [21.8- 28.5]         | 0.086 | 0.716   | 24.5 [22.8- 27.7]             |
| missing                                                   | 11 (2.9)                           | 18 (6.7)           | 10 (8.0)                  |       |         | 1 (4.8)                       |
| underweight                                               | 148 (38.5)                         | 117 (43.7)         | 57 (45.6)                 |       |         | 10 (47.6)                     |
| normal                                                    | 146 (38.0)                         | 87 (32.5)          | 37 (29.6)                 |       |         | 7 (33.3)                      |
| overweight                                                | 64 (16.7)                          | 39 (14.6)          | 19 (15.2)                 |       |         | 2 (9.5)                       |
| obese                                                     | 15 (3.9)                           | 7 (2.6)            | 2 (1.6)                   |       |         | 1 (4.8)                       |
| Age (years)                                               | 56.0 [46.0- 68.0]                  | 70.0 [62.0- 77.2]  | 72.0 [61.0, 78.0]         | 0.059 | 0.360   | 81.0 [75.0- 85.0]             |
| ≤50                                                       | 120 (31.2)                         | 29 (10.8)          | 13 (10.4)                 |       |         | 0 (0.0)                       |
| 51-65                                                     | 158 (41.1)                         | 60 (22.4)          | 29 (23.2)                 |       |         | 3 (14.3)                      |
| 66-80                                                     | 91 (23.7)                          | 134 (50.0)         | 58 (46.4)                 |       |         | 6 (28.6)                      |
| >80                                                       | 15 (3.9)                           | 45 (16.8)          | 25 (20.0)                 |       |         | 12 (57.1)                     |
| Admission from                                            |                                    |                    |                           | 0.020 | 0.851   |                               |
| home                                                      | 266 (69.3)                         | 172 (64.2)         | 79 (63.2)                 |       |         | 3 (14.3)                      |
| hospital                                                  | 114 (29.7)                         | 96 (35.8)          | 46 (36.8)                 |       |         | 8 (38.1)                      |
| nursing home                                              | 1 (0.3)                            | 0 (0.0)            | 0 (0.0)                   |       |         | 10 (47.6)                     |
| unknown                                                   | 3 (0.8)                            | 0 (0.0)            | 0 (0.0)                   |       |         | 0 (0.0)                       |
| GCS <sup>a</sup>                                          | 15 [8- 15]                         | 15 [9- 15]         | 14 [8- 15]                | 0.138 | 0.039   | 14 [10- 15]                   |
| APACHE 2 <sup>a</sup>                                     | 11 [7- 16]                         | 15 [10- 19]        | 15 [11- 21]               | 0.185 | 0.163   | 17 [13- 20]                   |
| SOFA <sup>a</sup>                                         | 5 [3- 8]                           | 6 [4- 9]           | 7 [4- 10]                 | 0.101 | 0.336   | 6 [4- 8]                      |
| CCI <sup>a</sup>                                          | 0 [0- 2]                           | 2 [0- 3]           | 2 [1- 4]                  | 0.258 | 0.004   | 3 [1- 4]                      |
| Reason for Admission*                                     |                                    |                    |                           |       |         |                               |
| Sepsis                                                    | 22 (5.7)                           | 29 (10.8)          | 27 (21.6)                 | 0.296 | 0.007   | 7 (33.3)                      |
| Polytrauma                                                | 28 (7.3)                           | 7 (2.6)            | 1 (0.8)                   | 0.140 | 0.423   | 0 (0.0)                       |
| TBI                                                       | 64 (16.7)                          | 27 (10.1)          | 9 (7.2)                   | 0.102 | 0.464   | 2 (9.5)                       |
| Non-traumatic brain pathology                             | 119 (31.0)                         | 54 (20.1)          | 19 (15.2)                 | 0.130 | 0.300   | 2 (9.5)                       |
| Postoperative                                             | 87 (22.7)                          | 56 (20.9)          | 33 (26.4)                 | 0.130 | 0.278   | 3 (14.3)                      |
| Cardiac                                                   | 9 (2.3)                            | 14 (5.2)           | 9 (7.2)                   | 0.082 | 0.585   | 1 (4.8)                       |
| Pulmonary                                                 | 75 (19.5)                          | 80 (29.9)          | 51 (40.8)                 | 0.231 | 0.042   | 10 (47.6)                     |
| Other                                                     | 57 (14.8)                          | 50 (18.7)          | 20 (16.0)                 | 0.070 | 0.617   | 6 (28.6)                      |
| Specialty*                                                |                                    |                    |                           | 0.084 | 0.903   |                               |
| Neurocritical                                             | 209 (54.4)                         | 109 (40.7)         | 52 (41.6)                 |       |         | 6 (28.6)                      |
| Surgical                                                  | 149 (38.8)                         | 136 (50.7)         | 63 (50.4)                 |       |         | 10 (47.6)                     |
| Medical                                                   | 11 (2.9)                           | 13 (4.9)           | 7 (5.6)                   |       |         | 3 (14.3)                      |
| Other                                                     | 15 (3.9)                           | 10 (3.7)           | 3 (2.4)                   |       |         | 2 (9.5)                       |

Data are n (%)- mean ± SD or median [IQR] SMD- standardized mean difference. Propensity Matching was performed with the factors mentioned below in the cohort of all patients. Reference for sex is male

<sup>a</sup> BMI: Body Mass Index; SOFA= Sequential Organ Failure Assessment; APACHE II: Acute Physiology and Chronic Health Evaluation; ICU: Intensive Care Unit; GCS: Glasgow Coma Scale; CCI: Charlson Comorbidity Index; TBI: Traumatic Brain Injury. \*Not used for matching

**Table S4.** Sensitivity Analysis of the primary and secondary outcomes in the propensity score matched cohort in survivors-only

|                                        | Non-frail patients<br>(n=268) | Frail patients<br>(n=125) | P Value | Effect size     | Effect size adjusted<br>for SMD >0.1 | Adjusted p for<br>SMD >0.1 |
|----------------------------------------|-------------------------------|---------------------------|---------|-----------------|--------------------------------------|----------------------------|
|                                        | Primary Outcome               |                           |         |                 |                                      |                            |
| Deterioration until hospital discharge | 185 (69.0)                    | 87 (69.6)                 | 1.000   | 1.0 [0.6 - 1.6] | 0.9 [0.6 - 1.5]                      | 0.731                      |
|                                        | Secondary Outcome             |                           |         |                 |                                      |                            |
| Deterioration until ICU discharge      | 262 (98.1)                    | 108 (86.4)                | <0.001  | 0.1 [0.0 - 0.3] | 0.1 [0.0 - 0.3]                      | <0.001                     |
|                                        | $\Delta$ Barthel points       |                           |         |                 |                                      |                            |
| until ICU discharge                    | -10 [-25, 0]                  | -10 [-20, 0]              | 0.123   | -5 [-5 - -0]    |                                      |                            |
| until hospital discharge               | -25 [-25, -15]                | -20 [-25, -5]             | <0.001  | 0 [-5 - 0]      |                                      |                            |
|                                        | Length of Stay (days)         |                           |         |                 |                                      |                            |
| ICU LOS                                | 11 [4, 23]                    | 10 [5, 24]                | 0.675   | 1 [-2 - 1]      |                                      |                            |
| Hospital LOS                           | 32 [20, 50]                   | 36 [21, 53]               | 0.100   | -4 [-8 - 1]     |                                      |                            |
|                                        | Discharge disposition         |                           |         |                 |                                      |                            |
| Home                                   | 112 (41.8)                    | 32 (25.6)                 | 0.003   | 0.5 [0.3 - 0.8] | 0.5 [0.3 - 0.8]                      | 0.005                      |

**Table S5.** Deterioration at hospital discharge in a logistic regression model in all patients

|                                                    | Odds Ratio [95%CI] <sup>a</sup> | P Value |
|----------------------------------------------------|---------------------------------|---------|
| Frailty (ref:frail)                                | 0.9 [0.6 - 1.4]                 | 0.614   |
| Sex (ref:female)                                   | 1.3 [1.0 - 1.8]                 | 0.097   |
| BMI <sup>a</sup> (kg/m <sup>2</sup> ) (ref:normal) |                                 | 0.528   |
| underweight                                        | 0.7 [0.3 - 1.3]                 | 0.252   |
| overweight                                         | 1.1 [0.8 - 1.6]                 | 0.548   |
| obese                                              | 1.3 [0.8 - 2.0]                 | 0.346   |
| missing                                            | 1.3 [0.5 - 3.5]                 | 0.563   |
| Age (years) (ref: ≤50)                             |                                 | <0.001  |
| 51-65                                              | 1.1 [0.7 - 1.8]                 | 0.560   |
| 66-80                                              | 2.0 [1.2 - 3.2]                 | 0.006   |
| >80                                                | 4.7 [2.3 - 9.3]                 | <0.001  |
| Admission from (ref:home)                          |                                 | 0.951   |
| hospital                                           | 1.1 [0.8 - 1.5]                 | 0.636   |
| nursing home                                       | 1.3 [0.2 - 6.4]                 | 0.783   |
| unknown                                            | 1.4 [0.1 - 19.3]                | 0.793   |
| GCS <sup>a</sup>                                   | 1.0 [0.9 - 1.0]                 | 0.517   |
| APACHE 2 <sup>a</sup>                              | 1.0 [1.0 - 1.1]                 | 0.088   |
| SOFA <sup>a</sup>                                  | 1.2 [1.1 - 1.2]                 | <0.001  |
| CCI <sup>a</sup>                                   | 1.1 [1.0 - 1.2]                 | 0.025   |
| Specialty (ref:Neurological & Neurosurgical)       |                                 | <0.001  |
| Surgical                                           | 0.3 [0.2 - 0.4]                 | <0.001  |
| Medical                                            | 0.2 [0.1 - 0.4]                 | <0.001  |
| Other                                              | 0.5 [0.2 - 1.4]                 | 0.210   |
| Sepsis (ref: no)                                   | 0.9 [0.5 - 1.6]                 | 0.659   |
| Polytrauma (ref: no)                               | 2.4 [0.9 - 6.5]                 | 0.071   |
| Traumatic brain injury (ref: no)                   | 1.1 [0.5 - 2.4]                 | 0.776   |
| Non-traumatic brain pathology (ref: no)            | 0.9 [0.5 - 1.8]                 | 0.791   |
| Postoperative (ref: no)                            | 0.8 [0.5 - 1.3]                 | 0.360   |
| Cardiac (ref: no)                                  | 1.2 [0.5 - 2.8]                 | 0.642   |
| Pulmonary (ref: no)                                | 1.5 [1.0 - 2.5]                 | 0.077   |
| Other (ref: no)                                    | 1.1 [0.6 - 2.0]                 | 0.683   |

This analysis includes all patients, missing values of deceased patients were assigned a value of 0, i.e., the worst possible outcome, Reference for sex is female,

<sup>a</sup> CI: Confidence Interval, BMI: Body Mass Index, SOFA: Sequential Organ Failure Assessment, APACHE II: Acute Physiology and Chronic Health Evaluation, GCS: Glasgow Coma Scale, CCI: Charlson Comorbidity Index

**Table S6:** Deterioration at hospital discharge in a logistic regression model in survivors-only

|                                                    | Odds Ratio [95% CI] <sup>a</sup> | P Value |
|----------------------------------------------------|----------------------------------|---------|
| Frailty (ref:frail)                                | 1.1 [0.7 - 1.8]                  | 0.642   |
| Sex (ref:female)                                   | 1.4 [1.0 - 2.0]                  | 0.070   |
| BMI <sup>a</sup> (kg/m <sup>2</sup> ) (ref:normal) |                                  | 0.553   |
| underweight                                        | 0.6 [0.3 - 1.3]                  | 0.209   |
| overweight                                         | 1.1 [0.8 - 1.6]                  | 0.575   |
| obese                                              | 1.2 [0.7 - 2.0]                  | 0.424   |
| missing                                            | 1.2 [0.4 - 3.4]                  | 0.745   |
| Age (years) (ref: ≤50)                             |                                  | <0.001  |
| 51-65                                              | 1.1 [0.7 - 1.8]                  | 0.625   |
| 66-80                                              | 1.9 [1.1 - 3.2]                  | 0.016   |
| >80                                                | 4.4 [2.1 - 9.5]                  | <0.001  |
| Admission from (ref:home)                          |                                  | 0.747   |
| hospital                                           | 1.2 [0.8 - 1.7]                  | 0.452   |
| nursing home                                       | 1.9 [0.4 - 10.8]                 | 0.446   |
| unknown                                            | 1.7 [0.1 - 27.4]                 | 0.708   |
| GCS <sup>a</sup>                                   | 1.0 [0.9 - 1.0]                  | 0.380   |
| APACHE 2 <sup>a</sup>                              | 1.0 [1.0 - 1.1]                  | 0.739   |
| SOFA <sup>a</sup>                                  | 1.1 [1.1 - 1.2]                  | <0.001  |
| CCI <sup>a</sup>                                   | 1.1 [1.0 - 1.2]                  | 0.116   |
| Specialty (ref:Neurocritical)                      |                                  | <0.001  |
| Surgical                                           | 0.3 [0.2 - 0.4]                  | <0.001  |
| Medical                                            | 0.1 [0.1 - 0.4]                  | <0.001  |
| Other                                              | 0.6 [0.2 - 1.7]                  | 0.354   |
| Sepsis (ref:no)                                    | 0.9 [0.5 - 1.7]                  | 0.738   |
| Polytrauma (ref:no)                                | 3.2 [1.2 - 8.5]                  | 0.021   |
| Traumatic brain injury (ref:no)                    | 1.2 [0.5 - 2.7]                  | 0.690   |
| Non-traumatic brain pathology (ref:no)             | 0.8 [0.4 - 1.8]                  | 0.642   |
| Postoperative (ref:no)                             | 0.9 [0.5 - 1.5]                  | 0.683   |
| Cardiac (ref:no)                                   | 0.9 [0.4 - 2.3]                  | 0.827   |
| Pulmonary (ref:no)                                 | 1.7 [1.0 - 2.8]                  | 0.041   |
| Other (ref:no)                                     | 1.1 [0.6 - 2.1]                  | 0.762   |

Logistic regression model of deterioration at hospital discharge. This analysis includes all survived patients. Reference for sex is female,

<sup>a</sup> CI: Confidence Interval, BMI: Body Mass Index, SOFA: Sequential Organ Failure Assessment, APACHE II: Acute Physiology and Chronic Health Evaluation, GCS: Glasgow Coma Scale, CCI: Charlson Comorbidity Index

**Table S7.** Deterioration at ICU discharge in a logistic regression model in all patients.

|                                                    | Odds Ratio [95% CI] <sup>a</sup> | P Value |
|----------------------------------------------------|----------------------------------|---------|
| Frailty (ref:frail)                                | 6.9 [3.2 - 14.9]                 | <0.001  |
| Sex (ref:female)                                   | 1.2 [0.6 - 2.2]                  | 0.606   |
| BMI <sup>a</sup> (kg/m <sup>2</sup> ) (ref:normal) |                                  | 0.181   |
| underweight                                        | 2.3 [0.5 - 11.1]                 | 0.288   |
| overweight                                         | 1.5 [0.8 - 3.0]                  | 0.230   |
| obese                                              | 1.3 [0.5 - 3.3]                  | 0.570   |
| missing                                            | 4700373.8 [0.0 - Inf]            | 0.985   |
| Age (years) (ref: ≤50)                             |                                  | 0.016   |
| 51-65                                              | 2.1 [0.9 - 4.8]                  | 0.083   |
| 66-80                                              | 3.4 [1.4 - 8.4]                  | 0.009   |
| >80                                                | 5.3 [1.7 - 16.0]                 | 0.003   |
| Admission from (ref:home)                          |                                  | 0.409   |
| hospital                                           | 0.6 [0.3 - 1.1]                  | 0.117   |
| nursing home                                       | 0.6 [0.1 - 3.3]                  | 0.572   |
| unknown                                            | 2295873.7 [0.0 - Inf]            | 0.995   |
| GCS <sup>a</sup>                                   | 1.0 [0.9 - 1.1]                  | 0.766   |
| APACHE 2 <sup>a</sup>                              | 1.0 [0.9 - 1.1]                  | 0.677   |
| SOFA <sup>a</sup>                                  | 1.1 [1.0 - 1.3]                  | 0.083   |
| CCI <sup>a</sup>                                   | 1.1 [0.9 - 1.3]                  | 0.288   |
| Specialty (ref:Neurocritical)                      |                                  | 0.249   |
| Surgical                                           | 0.7 [0.3 - 1.9]                  | 0.528   |
| Medical                                            | 0.3 [0.1 - 1.1]                  | 0.064   |
| Other                                              | 0.3 [0.1 - 1.9]                  | 0.219   |
| Sepsis (ref:no)                                    | 0.7 [0.3 - 1.9]                  | 0.481   |
| Polytrauma (ref:no)                                | 1.5 [0.2 - 14.1]                 | 0.712   |
| Traumatic brain injury (ref:no)                    | 1.4 [0.3 - 7.0]                  | 0.651   |
| Non-traumatic brain pathology (ref:no)             | 0.7 [0.2 - 2.5]                  | 0.628   |
| Postoperative (ref:no)                             | 2.9 [0.8 - 10.2]                 | 0.101   |
| Cardiac (ref:no)                                   | 1.7 [0.2 - 15.0]                 | 0.622   |
| Pulmonary (ref:no)                                 | 1.6 [0.6 - 4.0]                  | 0.346   |
| Other (ref:no)                                     | 0.8 [0.3 - 2.4]                  | 0.736   |

Logistic regression model of deterioration at ICU discharge. This analysis includes all patients, missing values of deceased patients were assigned a value of 0, i.e., the worst possible outcome, Reference for sex is female,

<sup>a</sup> CI: Confidence Interval; BMI: Body Mass Index; SOFA: Sequential Organ Failure Assessment; APACHE II: Acute Physiology and Chronic Health Evaluation; GCS: Glasgow Coma Scale; CCI: Charlson Comorbidity Index



**Table S8.** Deterioration at ICU discharge in a logistic regression model in survivors-only

|                                                    | Odds Ratio [95% CI] <sup>a</sup> | P Value |
|----------------------------------------------------|----------------------------------|---------|
| Frailty (ref:frail)                                | 7.3 [3.2 - 16.9]                 | <0.001  |
| Sex (ref:female)                                   | 1.4 [0.7 - 2.9]                  | 0.332   |
| BMI <sup>a</sup> (kg/m <sup>2</sup> ) (ref:normal) |                                  | 0.088   |
| underweight                                        | 5.2 [0.6 - 44.4]                 | 0.134   |
| overweight                                         | 1.9 [0.9 - 4.1]                  | 0.119   |
| obese                                              | 1.3 [0.5 - 3.5]                  | 0.607   |
| missing                                            | 3765272.2 [0.0 - Inf]            | 0.983   |
| Age (years) (ref: ≤50)                             |                                  | 0.048   |
| 51-65                                              | 2.1 [0.9 - 5.3]                  | 0.096   |
| 66-80                                              | 3.9 [1.4 - 10.7]                 | 0.009   |
| >80                                                | 4.2 [1.2 - 14.8]                 | 0.025   |
| Admission from (ref:home)                          |                                  | 0.380   |
| hospital                                           | 0.6 [0.3 - 1.1]                  | 0.096   |
| nursing home                                       | 0.6 [0.1 - 4.0]                  | 0.610   |
| unknown                                            | 1430095.1 [0.0 - Inf]            | 0.995   |
| GCS <sup>a</sup>                                   | 1.0 [0.8 - 1.1]                  | 0.572   |
| APACHE 2 <sup>a</sup>                              | 1.0 [0.9 - 1.1]                  | 0.678   |
| SOFA <sup>a</sup>                                  | 1.1 [1.0 - 1.3]                  | 0.075   |
| CCI <sup>a</sup>                                   | 1.0 [0.8 - 1.2]                  | 0.897   |
| Specialty (ref:Neurocritical)                      |                                  | 0.598   |
| Surgical                                           | 0.9 [0.3 - 2.6]                  | 0.881   |
| Medical                                            | 0.4 [0.1 - 1.6]                  | 0.186   |
| Other                                              | 0.8 [0.1 - 7.2]                  | 0.819   |
| Sepsis (ref:no)                                    | 0.8 [0.3 - 2.6]                  | 0.736   |
| Polytrauma (ref:no)                                | 1.5 [0.2 - 14.2]                 | 0.707   |
| Traumatic brain injury (ref:no)                    | 1.7 [0.3 - 9.3]                  | 0.557   |
| Non-traumatic brain pathology (ref:no)             | 0.8 [0.2 - 3.1]                  | 0.762   |
| Postoperative (ref:no)                             | 2.9 [0.8 - 11.0]                 | 0.114   |
| Cardiac (ref:no)                                   | 1.2 [0.1 - 11.1]                 | 0.894   |
| Pulmonary (ref:no)                                 | 1.7 [0.6 - 4.7]                  | 0.328   |
| Other (ref:no)                                     | 1.1 [0.3 - 4.0]                  | 0.865   |

Logistic regression model of deterioration at ICU discharge. This analysis includes all survivors. Reference for sex is female,

<sup>a</sup> CI: Confidence Interval; BMI: Body Mass Index; SOFA: Sequential Organ Failure Assessment; APACHE II: Acute Physiology and Chronic Health Evaluation; GCS: Glasgow Coma Scale; CCI: Charlson Comorbidity Index

**Table S9.** Secondary outcomes in all patients

|                                           | Non-frail<br>patients<br>(n=870) | Frail patients<br>(n=281) | P Value | Effect size     | Effect size adjusted<br>for SMD >0.1 | Adjusted p for<br>SMD >0.1 |
|-------------------------------------------|----------------------------------|---------------------------|---------|-----------------|--------------------------------------|----------------------------|
|                                           | Primary Outcome                  |                           |         |                 |                                      |                            |
| Deterioration until<br>hospital discharge | 638 (73.3)                       | 236 (84.0)                | <0.001  | 1.9 [1.3 - 2.7] | 1.3 [0.9 - 1.9]                      | 0.220                      |
|                                           | Secondary Outcome                |                           |         |                 |                                      |                            |
| Deterioration until ICU<br>discharge      | 827 (97.0)                       | 245 (90.4)                | <0.001  | 0.1 [0.0 - 0.3] | 0.1 [0.0 - 0.3]                      | <0.001                     |
|                                           | $\Delta$ Barthel points          |                           |         |                 |                                      |                            |
| until ICU discharge                       | -20 [-30 - 0]                    | -15 [-25 - -5]            | 0.412   | -5 [-5 - -5]    |                                      |                            |
| until hospital<br>discharge               | -25 [-30 - -20]                  | -20 [-25 - -10]           | <0.001  | -5 [-0 - 0]     |                                      |                            |
|                                           | Length of Stay (days)            |                           |         |                 |                                      |                            |
| ICU LOS                                   | 10 [5 - 22]                      | 10 [6 - 22]               | 0.190   | 0 [-2 - 0]      |                                      |                            |
| Hospital LOS                              | 25 [15 - 41]                     | 28 [15 - 44]              | 0.142   | -3 [-4 - 1]     |                                      |                            |
|                                           | Mortality                        |                           |         |                 |                                      |                            |
| ICU                                       | 159 (18.3)                       | 83 (29.5)                 | <0.001  | 1.9 [1.4 - 2.6] | 1.2 [0.8 - 1.7]                      | 0.387                      |
| Hospital                                  | 218 (25.1)                       | 135 (48.0)                | <0.001  | 2.8 [2.1 - 3.7] | 1.9 [1.4 - 2.6]                      | <0.001                     |
|                                           | Discharge disposition            |                           |         |                 |                                      |                            |
| Home                                      | 294 (33.8)                       | 35 (12.5)                 | <0.001  | 0.3 [0.2 - 0.4] | 0.4 [0.3 - 0.6]                      | <0.001                     |

**Table S10.** Functional trajectory using a mixed model of MTB over time in the propensity score matched cohort

|                                                    | Estimate [95% CI] <sup>a</sup> | P Value |
|----------------------------------------------------|--------------------------------|---------|
| Time                                               |                                | <0.001  |
| ICU discharge                                      | -23.3 [-24.2 - -22.4]          | <0.001  |
| Hospital discharge                                 | -17.6 [-18.5 - -16.7]          | <0.001  |
| Frailty (ref:frail)                                | -7.2 [-8.4 - -6.0]             | <0.001  |
| Sex (ref:female)                                   | -0.5 [-1.3 - 0.3]              | 0.241   |
| BMI <sup>a</sup> (kg/m <sup>2</sup> ) (ref:normal) |                                | 0.224   |
| underweight                                        | 2.0 [0.1 - 3.8]                | 0.039   |
| overweight                                         | 0.5 [-0.4 - 1.4]               | 0.249   |
| obese                                              | 0.3 [-0.9 - 1.5]               | 0.615   |
| missing                                            | -0.5 [-2.3 - 1.3]              | 0.581   |
| Age (years) (ref: ≤50)                             |                                | 0.002   |
| 51-65                                              | -0.2 [-1.8 - 1.4]              | 0.798   |
| 66-80                                              | -0.7 [-2.3 - 0.9]              | 0.386   |
| >80                                                | -2.3 [-4.0 - -0.7]             | 0.006   |
| Admission from (ref:home)                          |                                | 0.039   |
| hospital                                           | -1.2 [-2.0 - -0.4]             | 0.005   |
| unknown                                            | -1.8 [-7.6 - 4.0]              | 0.549   |
| GCS <sup>a</sup>                                   | -2.1 [-7.1 - 2.9]              | 0.417   |
| APACHE 2 <sup>a</sup>                              | 0.1 [-0.1 - 0.2]               | 0.254   |
| SOFA <sup>a</sup>                                  | -0.1 [-0.2 - -0.0]             | 0.032   |
| CCI <sup>a</sup>                                   |                                | <0.001  |
| Specialty (ref:Neurocritical)                      | -0.2 [-0.3 - -0.0]             | 0.031   |
| Surgical                                           | -0.2 [-0.4 - -0.0]             | 0.019   |
| Medical                                            | 3.2 [2.1 - 4.4]                | <0.001  |
| Other                                              | 1.7 [-0.1 - 3.5]               | 0.065   |
| Sepsis (ref:no)                                    | 6.0 [3.3 - 8.8]                | <0.001  |
| Polytrauma (ref:no)                                | -0.4 [-1.7 - 0.9]              | 0.503   |
| Traumatic brain injury (ref:no)                    | -1.5 [-4.3 - 1.4]              | 0.312   |
| Non-traumatic brain pathology (ref:no)             | 0.7 [-1.0 - 2.5]               | 0.417   |
| Postoperative (ref:no)                             | -0.0 [-1.5 n= 1.5]             | 0.983   |
| Cardiac (ref:no)                                   | 1.2 [-0.1 n= 2.5]              | 0.075   |
| Pulmonary (ref:no)                                 | -0.9 [-2.5 n= 0.7]             | 0.292   |
| Other (ref:no)                                     | 0.1 [-1.0 n= 1.2]              | 0.830   |
| Interaction Time Frailty                           |                                | <0.001  |
| ICU <sup>a</sup> discharge*Non-Frail               | -0.4 [-1.8 n= 1.1]             | 0.608   |
| Hospital discharge*Non-Frail                       | 5.8 [4.2 n= 7.4]               | <0.001  |

This analysis includes all selected patients, missing values of deceased patients were assigned a value of 0, i.e., the worst possible outcome, reference for sex is female.

<sup>a</sup> CI: Confidence Interval; BMI: Body Mass Index; SOFA: Sequential Organ Failure Assessment; APACHE II: Acute Physiology and Chronic Health Evaluation; GCS: Glasgow Coma Scale; CCI: Charlson Comorbidity Index; ICU: Intensive Care Unit; MTB: Mobility-Transfer-Barthel, sum score of the subdomain Mobility and Transfer of the Barthel Score

**Table S11.** Functional trajectory using a mixed model of MTB over time in all patients

|                                                    | Estimate [95% CI] <sup>a</sup> | P Value |
|----------------------------------------------------|--------------------------------|---------|
| Time                                               |                                | <0.001  |
| ICU discharge                                      | -22.9 [-23.6 n= -22.2]         | <0.001  |
| Hospital discharge                                 | -16.4 [-17.1 n= -15.7]         | <0.001  |
| Frailty (ref:frail)                                | -6.4 [-7.5 n= -5.3]            | <0.001  |
| Sex (ref:female)                                   | -0.4 [-1.0 n= 0.2]             | 0.209   |
| BMI <sup>a</sup> (kg/m <sup>2</sup> ) (ref:normal) |                                | 0.320   |
| underweight                                        | 1.0 [-0.5 n= 2.6]              | 0.181   |
| overweight                                         | 0.5 [-0.2 n= 1.2]              | 0.172   |
| obese                                              | 0.4 [-0.6 n= 1.3]              | 0.448   |
| missing                                            | -0.7 [-2.2 n= 0.8]             | 0.359   |
| Age (years) (ref: ≤50)                             |                                | <0.001  |
| 51-65                                              | -0.8 [-1.7 n= 0.2]             | 0.104   |
| 66-80                                              | -1.6 [-2.6 n= -0.6]            | 0.001   |
| >80                                                | -3.2 [-4.3 n= -2.0]            | <0.001  |
| Admission from (ref:home)                          |                                | 0.075   |
| hospital                                           | -0.9 [-1.6 n= -0.2]            | 0.010   |
| unknown                                            | -0.6 [-2.9 n= 1.7]             | 0.610   |
| GCS <sup>a</sup>                                   | -1.2 [-5.3 n= 3.0]             | 0.584   |
| APACHE 2 <sup>a</sup>                              | 0.1 [-0.0 n= 0.2]              | 0.176   |
| SOFA <sup>a</sup>                                  | -0.1 [-0.2 n= -0.0]            | 0.002   |
| CCI <sup>a</sup>                                   |                                | <0.001  |
| Specialty (ref:Neurocritical)                      | -0.3 [-0.4 n= -0.1]            | <0.001  |
| Surgical                                           | -0.2 [-0.3 n= -0.0]            | 0.012   |
| Medical                                            | 3.3 [2.4 n= 4.2]               | <0.001  |
| Other                                              | 2.7 [1.2 n= 4.1]               | <0.001  |
| Sepsis (ref:no)                                    | 5.1 [3.2 n= 6.9]               | <0.001  |
| Polytrauma (ref:no)                                | -1.0 [-2.1 n= 0.1]             | 0.085   |
| Traumatic brain injury (ref:no)                    | -1.2 [-2.9 n= 0.6]             | 0.197   |
| Non-traumatic brain pathology (ref:no)             | 0.3 [-1.0 n= 1.6]              | 0.688   |
| Postoperative (ref:no)                             | -0.2 [-1.4 n= 1.0]             | 0.727   |
| Cardiac (ref:no)                                   | 0.7 [-0.3 n= 1.8]              | 0.155   |
| Pulmonary (ref:no)                                 | -0.4 [-1.8 n= 1.0]             | 0.548   |
| Other (ref:no)                                     | -0.2 [-1.1 n= 0.6]             | 0.586   |
| Interaction Time Frailty                           |                                | <0.001  |
| ICU <sup>a</sup> discharge*Non-Frail               | -0.6 [-1.8 n= 0.6]             | 0.334   |
| Hospital discharge*Non-Frail                       | 5.2 [3.8 - 6.6]                | <0.001  |

This analysis includes all patients, missing values of expired patients were assigned a value of 0, i.e., the worst possible outcome, reference for sex is female,

<sup>a</sup> CI: Confidence Interval; BMI: Body Mass Index; SOFA: Sequential Organ Failure Assessment; APACHE II: Acute Physiology and Chronic Health Evaluation; GCS: Glasgow Coma Scale; CCI: Charlson Comorbidity Index; ICU: Intensive Care Unit; MTB: Mobility-Transfer-Barthel, sum score of the subdomain Mobility and Transfer of the Barthel Score

**Table S12.** Functional trajectory using a mixed model of MTB over time in survivors-only

|                                                    | Estimate [95% CI] <sup>a</sup> | P Value |
|----------------------------------------------------|--------------------------------|---------|
| Time                                               |                                | <0.001  |
| ICU discharge                                      | -21.2 [-22.0 - -20.5]          | <0.001  |
| Hospital discharge                                 | -12.0 [-12.8 - -11.3]          | <0.001  |
| Frailty (ref:frail)                                | -7.1 [-8.5 - -5.6]             | <0.001  |
| Sex (ref:female)                                   | -0.5 [-1.3 - 0.2]              | 0.174   |
| BMI <sup>a</sup> (kg/m <sup>2</sup> ) (ref:normal) |                                | 0.407   |
| underweight                                        | 1.2 [-0.5 - 2.9]               | 0.177   |
| overweight                                         | 0.6 [-0.2 - 1.5]               | 0.140   |
| obese                                              | 0.7 [-0.4 - 1.8]               | 0.224   |
| missing                                            | -0.3 [-2.4 - 1.9]              | 0.815   |
| Age (years) (ref: ≤50)                             |                                | 0.003   |
| 51-65                                              | -0.8 [-1.9 - 0.3]              | 0.159   |
| 66-80                                              | -1.2 [-2.4 - -0.1]             | 0.038   |
| >80                                                | -2.8 [-4.2 - -1.3]             | <0.001  |
| Admission from (ref:home)                          |                                | 0.038   |
| hospital                                           | -1.1 [-1.9 - -0.3]             | 0.011   |
| unknown                                            | -2.7 [-5.9 - 0.6]              | 0.105   |
| GCS <sup>a</sup>                                   | -0.7 [-6.6 - 5.2]              | 0.814   |
| APACHE 2 <sup>a</sup>                              | 0.1 [-0.1 - 0.2]               | 0.258   |
| SOFA <sup>a</sup>                                  | -0.1 [-0.2 - 0.0]              | 0.083   |
| CCI <sup>a</sup>                                   |                                | <0.001  |
| Specialty (ref:Neurocritical)                      | -0.2 [-0.4 - -0.1]             | 0.006   |
| Surgical                                           | -0.2 [-0.3 - 0.0]              | 0.102   |
| Medical                                            | 4.0 [2.9 - 5.1]                | <0.001  |
| Other                                              | 4.4 [2.4 - 6.4]                | <0.001  |
| Sepsis (ref:no)                                    | 4.8 [2.8 - 6.9]                | <0.001  |
| Polytrauma (ref:no)                                | -0.9 [-2.3 - 0.5]              | 0.213   |
| Traumatic brain injury (ref:no)                    | -2.3 [-4.2 - -0.4]             | 0.018   |
| Non-traumatic brain pathology (ref:no)             | 0.4 [-1.3 - 2.0]               | 0.666   |
| Postoperative (ref:no)                             | 0.7 [-0.8 - 2.2]               | 0.366   |
| Cardiac (ref:no)                                   | 0.2 [-1.0 - 1.4]               | 0.701   |
| Pulmonary (ref:no)                                 | 0.6 [-1.3 - 2.6]               | 0.515   |
| Other (ref:no)                                     | -0.2 [-1.3 - 0.9]              | 0.698   |
| Interaction Time Frailty                           |                                | <0.001  |
| ICU <sup>a</sup> discharge*Non-Frail               | -0.6 [-2.1 - 0.8]              | 0.393   |
| Hospital discharge*Non-Frail                       | 6.0 [4.2 - 7.8]                | <0.001  |

This analysis includes all survived patients, missing values of expired patients were assigned a value of 0, i.e., the worst possible outcome, reference for sex is female,

<sup>a</sup> CI: Confidence Interval; BMI: Body Mass Index; SOFA: Sequential Organ Failure Assessment; APACHE II: Acute Physiology and Chronic Health Evaluation; GCS: Glasgow Coma Scale; CCI: Charlson Comorbidity Index; ICU: Intensive Care Unit; MTB: Mobility-Transfer-Barthel, sum score of the subdomain Mobility and Transfer of the Barthel Score
